# Supplementary material for: McMYB4 improves temperature adaptation by regulating phenylpropanoid metabolism and hormone signaling in apple
Source: Springer Nature journal article supplement (doi:10.1038/s41438-021-00620-0), 2021-08-01
Supplement: MOESM2 [file 41438_2021_620_MOESM2_ESM.pdf]

This document certifies that the manuscript

**McMYB4 improves temperature adaptation by regulating phenylpropanoid metabolism and hormone signalling in apple**

prepared by the authors

**Suxiao Hao, Yanfen Lu, Zhen Peng, Enying Wang, Linke Chao, Silin Zhong,...**

was edited for proper English language, grammar, punctuation, spelling, and overall style by one or more of the highly qualified native English speaking editors at AJE.

This certificate was issued on **March 29, 2021** and may be verified on the [AJE website](#) using the verification code **3D5F-9962-6EB9-C5FA-DC6P**.

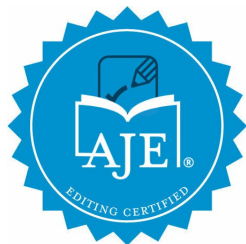

Neither the research content nor the authors' intentions were altered in any way during the editing process. Documents receiving this certification should be English-ready for publication; however, the author has the ability to accept or reject our suggestions and changes. To verify the final AJE edited version, please visit our verification page at [aje.com/certificate](#). If you have any questions or concerns about this edited document, please contact AJE at [support@aje.com](mailto:support@aje.com).
